# Supplementary material for: Reversible human-temperature-responsive luminescence switching in a Mn(ii)-based metal halide
Source: Royal Society of Chemistry journal article supplement (doi:10.1039/d2tc04727f), 2022-12-08
Supplement: d2tc04727f1.pdf [file d2tc04727f1.pdf]

## **Electronic Supplementary Information**

### **Reversible human-temperature-responsive luminescence switching in a Mn(II)-based metal halide**

Zi-Lin He,<sup>‡</sup> Jun-Hua Wei,<sup>‡</sup> Jian-Bin Luo, Zhi-Zhong Zhang, Dai-Bin Kuang\*

MOE Key Laboratory of Bioinorganic and Synthetic Chemistry, Lehn Institute of Functional Materials, School of Chemistry, Sun Yat-sen University, Guangzhou 510275, P. R. China.

Corresponding author: Dai-Bin Kuang Email: [kuangdb@mail.sysu.edu.cn](mailto:kuangdb@mail.sysu.edu.cn)

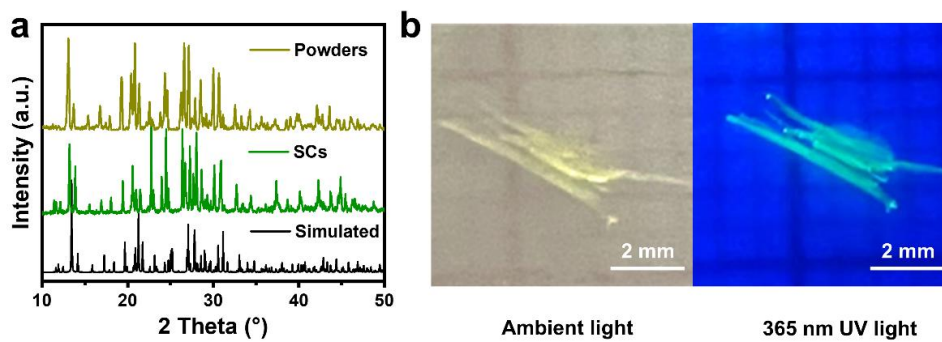

**Fig. S1.** (a) The simulated PXRD pattern from SCXRD data and experimental PXRD patterns of  $(\text{TMS})_2\text{MnBr}_4$  SCs and powders. (b) Photographs of  $(\text{TMS})_2\text{MnBr}_4$  SCs (under ambient light and 365 nm UV light).

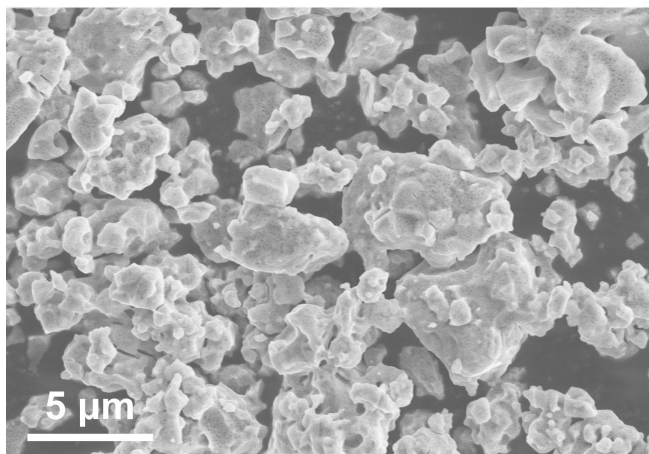

**Fig. S2.** The SEM image of the ball-milled (TMS)<sub>2</sub>MnBr<sub>4</sub> powders.

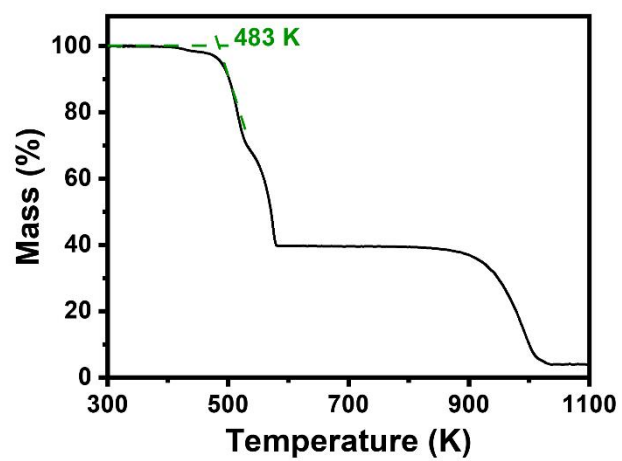

**Fig. S3.** Thermogravimetric (TG) analysis of the ball-milled  $(\text{TMS})_2\text{MnBr}_4$  powders.

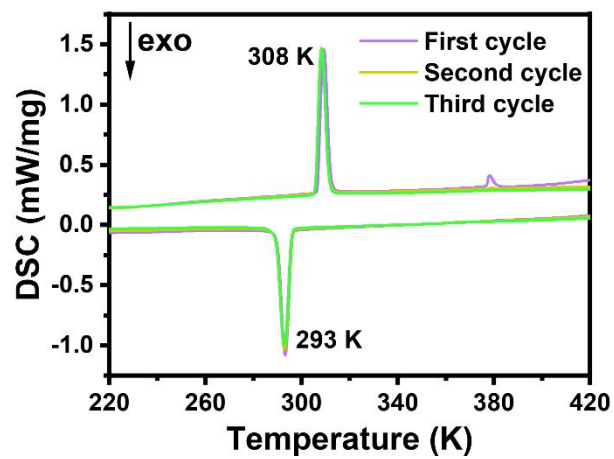

**Fig. S4.** Differential scanning calorimetry (DSC) plots of the ball-milled  $(\text{TMS})_2\text{MnBr}_4$  powders during three heating-cooling cycles.

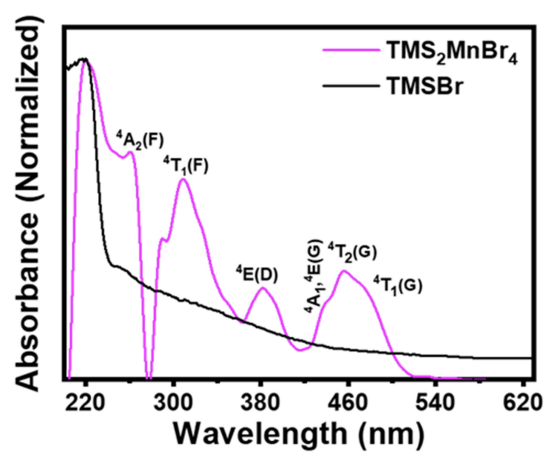

**Fig. S5.** The UV-Vis absorption spectra of  $(\text{TMS})_2\text{MnBr}_4$  powders and  $\text{TMSBr}$ .

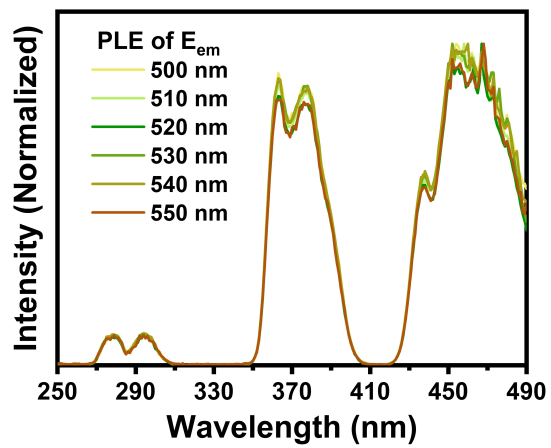

**Fig. S6.** Emission-wavelength-dependent PLE spectra of ball-milled  $(TMS)_2MnBr_4$  powders.

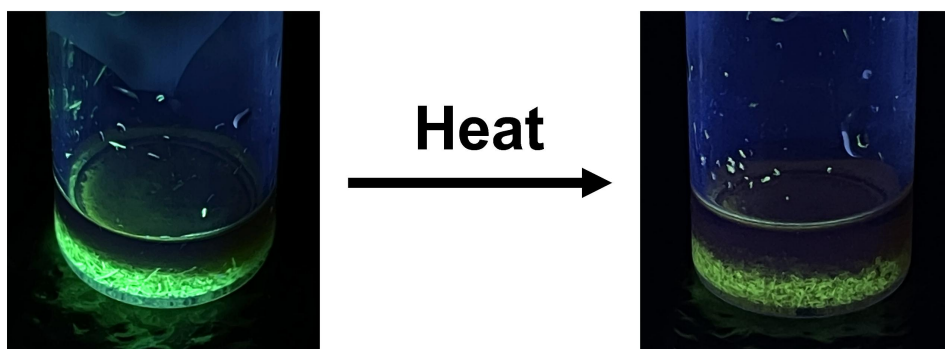

**Fig. S7.** Photographs of  $(\text{TMS})_2\text{MnBr}_4$  single crystals before and after heating (under ambient and 365 nm UV light)



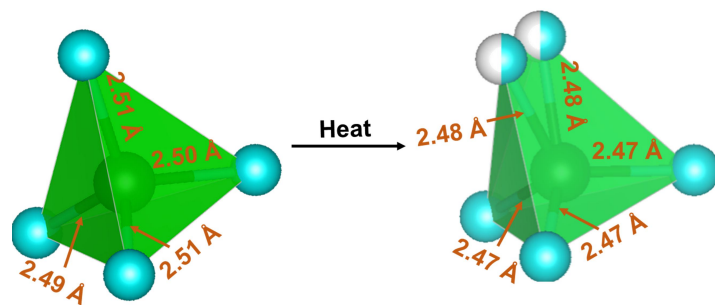

**Fig. S8.** The length of Mn-Br bonds of  $(\text{TMS})_2\text{MnBr}_4$  before and after heating.

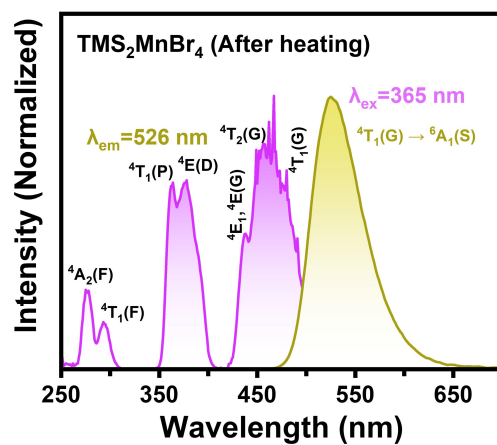

**Fig. S9.** The steady-state PLE and PL spectra of (TMS)<sub>2</sub>MnBr<sub>4</sub> powders at 310 K.

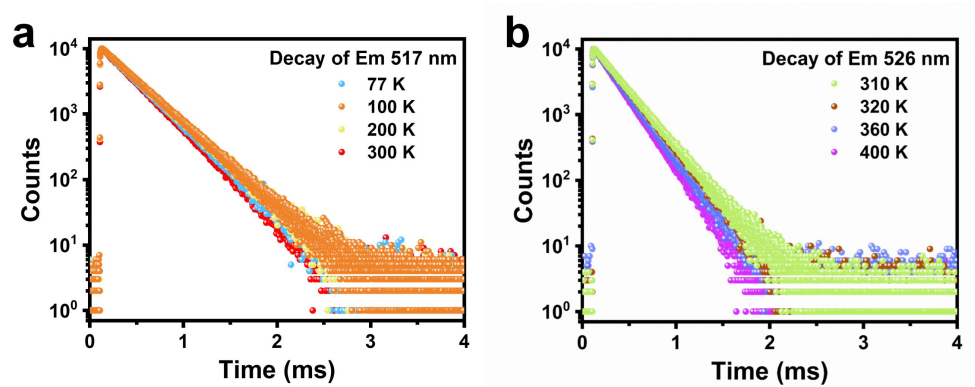

**Fig. S10.** (a) The TRPL spectra of ball-milled  $(\text{TMS})_2\text{MnBr}_4$  powders by monitoring 517 nm at 77 K, 100 K, 200 K, and 300 K. (b) The TRPL spectra by monitoring 526 nm at 310 K, 320 K, 360 K, and 400 K.

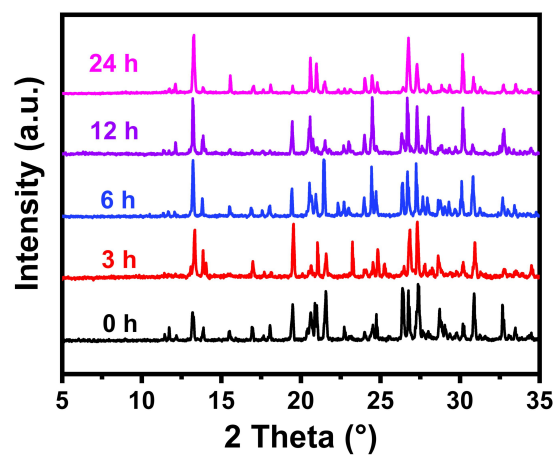

**Fig. S11.** PXRD patterns of  $(\text{TMS})_2\text{MnBr}_4$  power under continuous 24 h UV radiation.

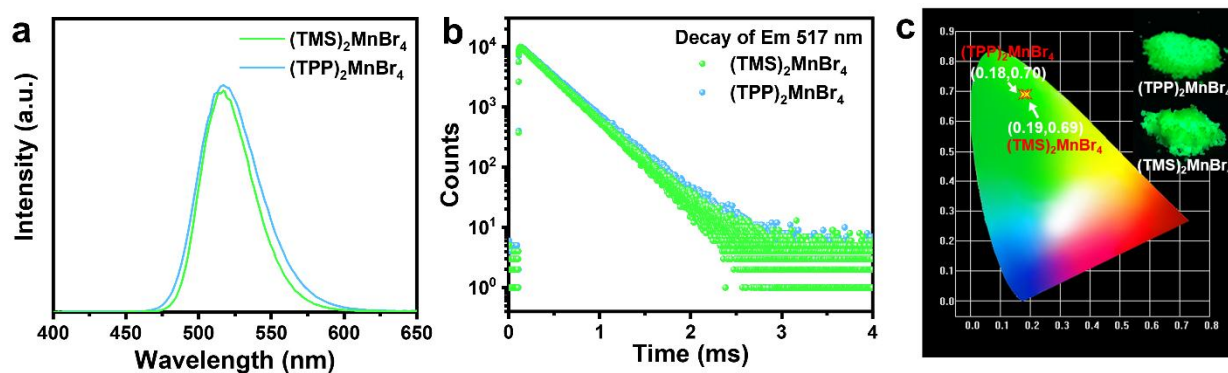

**Fig. S12.** (a) Steady-state PL spectra under the excitation of 365 nm incident light. (b) TRPL spectra by monitoring 517 nm. (c) CIE chromaticity coordinate diagrams of  $(\text{TMS})_2\text{MnBr}_4$  and  $(\text{TPP})_2\text{MnBr}_4$  powders.

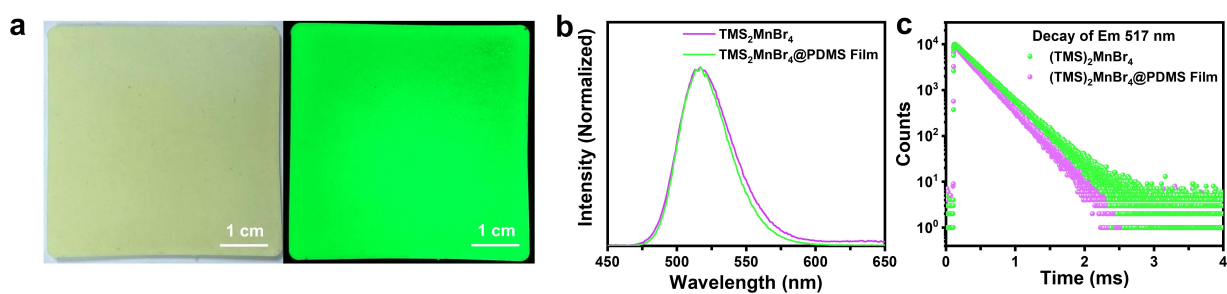

**Fig. S13.** (a) The photographs of the  $(TMS)_2MnBr_4@PDMS$  film under visible light and 365 nm UV irradiation. (b) Steady-state PL spectra under the excitation of 365 nm UV light. (c) TRPL spectra of  $(TMS)_2MnBr_4$  and  $(TMS)_2MnBr_4@PDMS$  film by probing 517 nm.

**Table S1.** Single-crystal X-ray diffraction data of (TMS)<sub>2</sub>MnBr<sub>4</sub> at 150 K and 313 K.

| Compound                                      | (TMS) <sub>2</sub> MnBr <sub>4</sub>          | (TMS) <sub>2</sub> MnBr <sub>4</sub>      |
|-----------------------------------------------|-----------------------------------------------|-------------------------------------------|
| Formula weight                                | 528.90                                        | 528.90                                    |
| Temperature (K)                               | 150                                           | 313                                       |
| Crystal system                                | orthorhombic                                  | orthorhombic                              |
| Space group                                   | P2 <sub>1</sub> 2 <sub>1</sub> 2 <sub>1</sub> | <i>Pnma</i>                               |
| a (Å)                                         | 9.01520(10)                                   | 12.5715(9)                                |
| b (Å)                                         | 13.0979(2)                                    | 8.8296(14)                                |
| c (Å)                                         | 14.2021(2)                                    | 16.0251(19)                               |
| α (°)                                         | 90                                            | 90                                        |
| β (°)                                         | 90                                            | 90                                        |
| γ (°)                                         | 90                                            | 90                                        |
| Volume (Å <sup>3</sup> )                      | 1676.99(4)                                    | 1778.8(4)                                 |
| Z                                             | 4                                             | 4                                         |
| ρ <sub>calc.</sub> (g/mm <sup>3</sup> )       | 2.095                                         | 1.975                                     |
| μ (mm <sup>-1</sup> )                         | 19.628                                        | 18.505                                    |
| Radiation                                     | Cu Kα (λ = 1.54184 Å)                         | Cu Kα (λ = 1.54184 Å)                     |
| 2θ range for data collection (°)              | 9.184 ≤ 2θ ≤ 152.284                          | 8.94 ≤ 2θ ≤ 145.932                       |
| Index ranges                                  | -6 ≤ h ≤ 11, -16 ≤ k ≤ 15,<br>-15 ≤ l ≤ 17    | -9 ≤ h ≤ 15, -10 ≤ k ≤ 9,<br>-19 ≤ l ≤ 14 |
| R(reflections), wR <sub>2</sub> (reflections) | 0.0306, 0.0759                                | 0.2333, 0.6007                            |
| Data completeness                             | 1.0000                                        | 1.0000                                    |
| Parameters refined                            | 124                                           | 107                                       |
| Goodness-of-fit on F <sup>2</sup>             | 1.103                                         | 1.5050                                    |

**Table S2.** The excitation-wavelength-dependent PLQY values of the ball-milled  $(\text{TMS})_2\text{MnBr}_4$  powders.

| Wavelength (nm) | PLQY (%) |
|-----------------|----------|
| 355             | 45.4     |
| 365             | 69.8     |
| 375             | 70.0     |
| 385             | 66.6     |
| 395             | 60.2     |
| 405             | 28.1     |
| 415             | 14.5     |
| 425             | 34.6     |
| 435             | 59.1     |
| 445             | 59.4     |
| 455             | 59.8     |
| 465             | 58.5     |



**Table S3.** The data of temperature-dependent TRPL spectra.

| Temperature (K) | Lifetime ( $\mu\text{s}$ ) |
|-----------------|----------------------------|
| 77              | 321.01                     |
| 100             | 335.83                     |
| 200             | 333.89                     |
| 300             | 306.81                     |
| 310             | 253.41                     |
| 320             | 248.36                     |
| 360             | 224.49                     |
| 400             | 208.43                     |

**Table S4.** The PL characteristics of different thermal-responsive Mn(II)-based OIMHs.

| Chemical formula                                                                                                   | Peak position (RT, nm) | PLQY (%) | Responsive temperature (K) | Reversibility | Refs.     |
|--------------------------------------------------------------------------------------------------------------------|------------------------|----------|----------------------------|---------------|-----------|
| C <sub>29</sub> H <sub>23</sub> Br <sub>2</sub> MnN                                                                | 588                    | 10.1     | 480/80                     | Reversible    | 1         |
| (ASN) <sub>2</sub> MnBr <sub>4</sub>                                                                               | 525                    | 13.07    | 373                        | Reversible    | 2         |
| (C <sub>4</sub> H <sub>9</sub> NH <sub>3</sub> ) <sub>2</sub> MnI <sub>4</sub>                                     | 550/672                | 20.05    | 343                        | Reversible    | 3         |
| (TMPA) <sub>2</sub> MnI <sub>4</sub>                                                                               | 545/660                | 22.98    | 220/383                    | Reversible    | 4         |
| (C <sub>4</sub> NOH <sub>10</sub> ) <sub>5</sub> Mn <sub>2</sub> Cl <sub>9</sub> ·C <sub>2</sub> H <sub>5</sub> OH | 620                    | 29       | 363                        | Irreversible  | 5         |
| C <sub>4</sub> H <sub>14</sub> N <sub>2</sub> MnBr <sub>4</sub>                                                    | 516/623                | N.M.     | 80/490                     | Reversible    | 6         |
| (TMS) <sub>2</sub> MnBr <sub>4</sub>                                                                               | 517                    | 69.8     | 308 (Human temperature)    | Reversible    | This work |

## Notes and References

- 1 Y. Wu, X. Zhang, Y.-Q. Zhang, M. Yang and Z.-N. Chen, *Chem. Commun.*, 2018, **54**, 13961-13964.
- 2 L. Xu, J.-X. Gao, X.-G. Chen, X.-N. Hua and W.-Q. Liao, *Dalton Trans.*, 2018, **47**, 16995-17003.
- 3 X. Jiang, S. Xia, J. Zhang, D. Ju, Y. Liu, X. Hu, L. Wang, Z. Chen and X. Tao, *ChemSusChem*, 2019, **12**, 5228-5232.
- 4 Z.-C. Zhang, T. Zhang, C.-Y. Su, M.-M. Lun, Y. Zhang, D.-W. Fu and Q. Wu, *Inorg. Chem.*, 2022, **61**, 13322-13329.
- 5 M.-E. Sun, Y. Li, X.-Y. Dong and S.-Q. Zang, *Chem. Sci.*, 2019, **10**, 3836-3839.
- 6 H. Peng, T. Huang, B. Zou, Y. Tian, X. Wang, Y. Guo, T. Dong, Z. Yu, C. Ding, F. Yang and J. Wang, *Nano Energy*, 2021, **87**, 106166.
